# Supplementary material for: The Antidepressant Activity of a Taurine-Containing Derivative of 4-Phenylpyrrolidone-2 in a Model of Chronic Unpredictable Mild Stress
Source: MDPI journal article supplement (doi:10.3390/ijms242316564), 2023-11-21
Supplement: s1 [file s1]

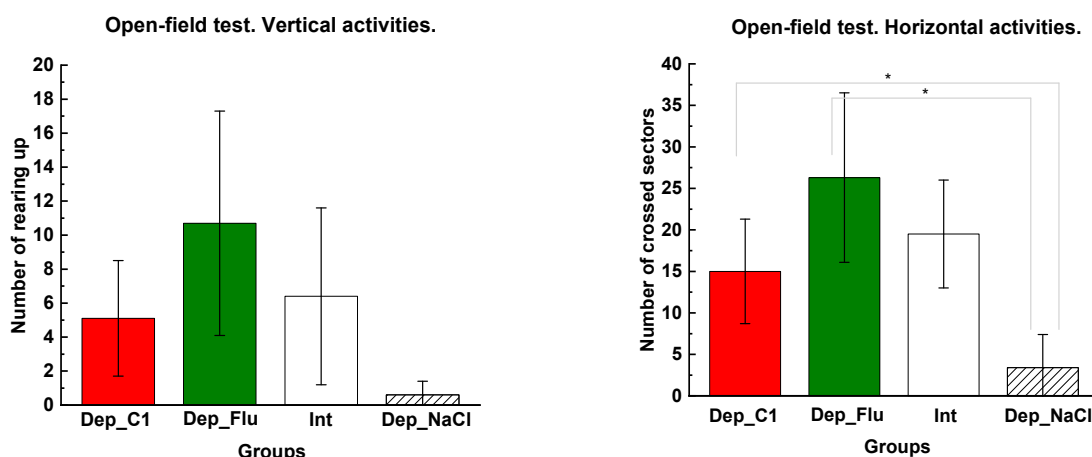

**Figure S1:** Results of the Open-field test: (a) vertical and (b) horizontal activities. The results are presented as the mean value  $\pm$  standard error. Compared to the animals treated with physiological saline, \*  $p < 0.01$  by one-way ANOVA followed by post hoc analysis by Fisher's LSD test

**Table S1:** Data of HBT conducted on the 0 and 14th days of the experiment

| Rat number | Number of crossed sectors |        | Group after 0d | Group after 14d |
|------------|---------------------------|--------|----------------|-----------------|
|            | 0 day                     | 14 day |                |                 |
| 1          | 25                        | 7      | Depression     | Compaund I      |
| 2          | 23                        | 5      | Depression     | Compaund I      |
| 3          | 58                        |        | Excluded       |                 |
| 4          | 31                        | 8      | Depression     | Fluoxetine      |
| 5          | 42                        | 1      | Depression     | NaCl 0,9%       |
| 6          | 36                        | 1      | Depression     | Compaund I      |
| 7          | 35                        | 7      | Depression     | Compaund I      |
| 8          | 30                        | 7      | Depression     | Compaund I      |
| 9          | 24                        | 4      | Depression     | NaCl 0,9%       |
| 10         | 20                        | 2      | Depression     | Fluoxetine      |
| 11         | 26                        | 1      | Depression     | NaCl 0,9%       |
| 12         | 23                        | 4      | Depression     | Compaund I      |
| 13         | 30                        | 13     | Intact         | Intact          |
| 14         | 22                        | 0      | Depression     | Compaund I      |
| 15         | 40                        | 3      | Depression     | Fluoxetine      |
| 16         | 42                        | 7      | Depression     | Compaund I      |
| 17         | 30                        | 11     | Depression     | Fluoxetine      |
| 18         | 31                        | 6      | Depression     | Compaund I      |
| 19         | 41                        | 4      | Depression     | Compaund I      |
| 20         | 30                        | 7      | Depression     | Compaund I      |
| 21         | 19                        | 5      | Depression     | Compaund I      |
| 22         | 22                        | 8      | Depression     | Fluoxetine      |
| 23         | 39                        | 23     | Intact         | Intact          |
| 24         | 20                        | 23     | Intact         | Intact          |
| 25         | 28                        | 18     | Intact         | Intact          |

|    |    |    |            |                      |
|----|----|----|------------|----------------------|
| 26 | 20 | 2  | Depression | NaCl 0,9%            |
| 27 | 29 | 8  | Depression | NaCl 0,9%            |
| 28 | 43 | 1  | Depression | Fluoxetine           |
| 29 | 30 | 10 | Depression | NaCl 0,9%            |
| 30 | 20 | 17 | Depression | <b>No depression</b> |
| 31 | 25 | 32 | Intact     | Intact               |
| 32 | 24 | 22 | Intact     | Intact               |
| 33 | 32 | 3  | Depression | Fluoxetine           |
| 34 | 8  |    | Excluded   |                      |
| 35 | 29 | 10 | Depression | Fluoxetine           |
| 36 | 35 | 8  | Depression | NaCl 0,9%            |
| 37 | 29 | 37 | Intact     | Intact               |
| 38 | 37 | 21 | Intact     | Intact               |
| 39 | 38 | 28 | Depression | <b>No depression</b> |
| 40 | 21 | 8  | Depression | NaCl 0,9%            |
| 41 | 33 | 2  | Depression | NaCl 0,9%            |
| 42 | 26 | 5  | Depression | Fluoxetine           |
| 43 | 18 | 37 | Intact     | Intact               |
| 44 | 25 | 21 | Intact     | Intact               |
| 45 | 34 | 10 | Depression | Fluoxetine           |
| 46 | 17 | 2  | Depression | Fluoxetine           |
| 47 | 26 | 4  | Depression | Fluoxetine           |
| 48 | 28 | 7  | Depression | NaCl 0,9%            |
| 49 | 26 | 3  | Depression | NaCl 0,9%            |
| 50 | 21 | 6  | Depression | NaCl 0,9%            |
| 51 | 43 | 19 | Intact     | Intact               |
| 52 | 26 | 28 | Intact     | Intact               |

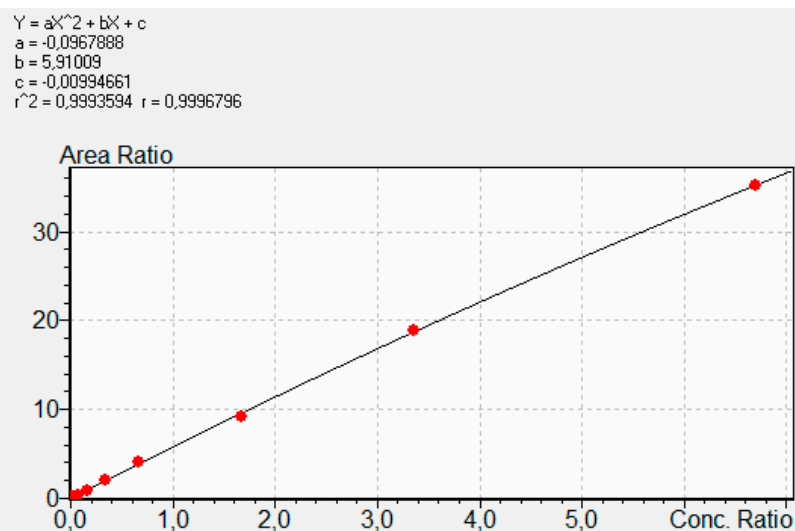

**Figure S2.** Calibration curve for dopamine determination. Internal standard method. Quadratic dependence, weight coefficient 1/C.

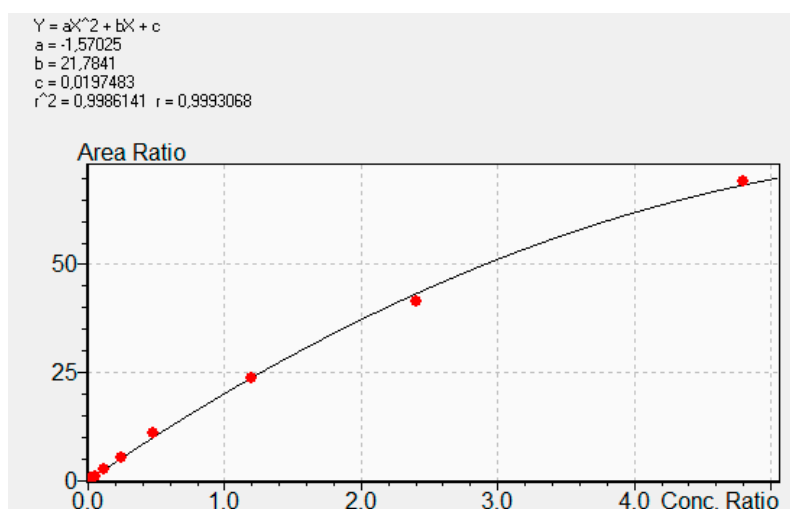

**Figure S3.** Calibration curve for serotonin determination. Internal standard method. Quadratic dependence, weight coefficient 1/C.

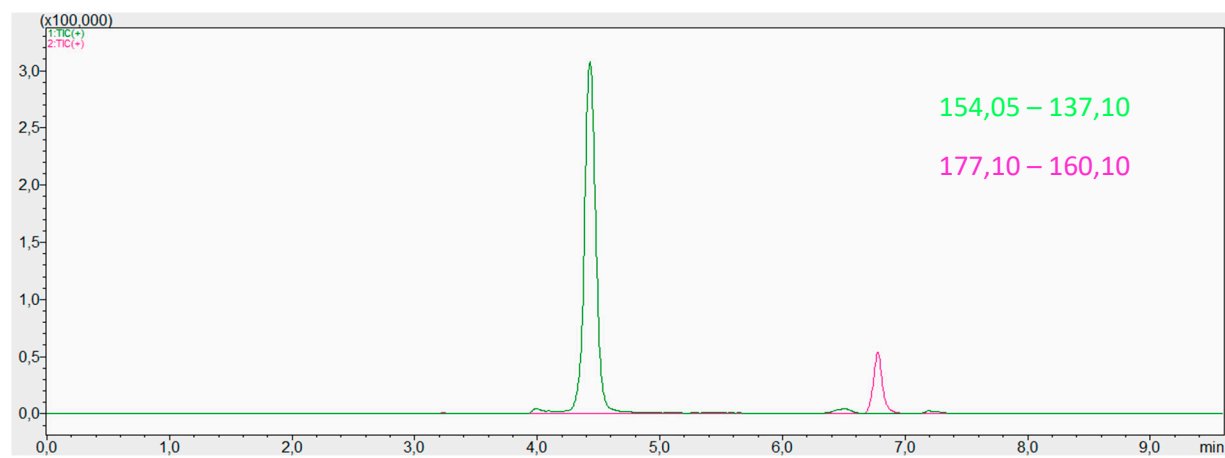

**Figure S4.** Striatum multiple reaction monitoring (MRM) chromatogram. Positive ion mode (ESI+). Dopamine green, serotonin – pink, Figure S5 Striatum multiple reaction monitoring (MRM) chromatogram. Negative ion mode (ESI-). Caffeic acid (internal standard)

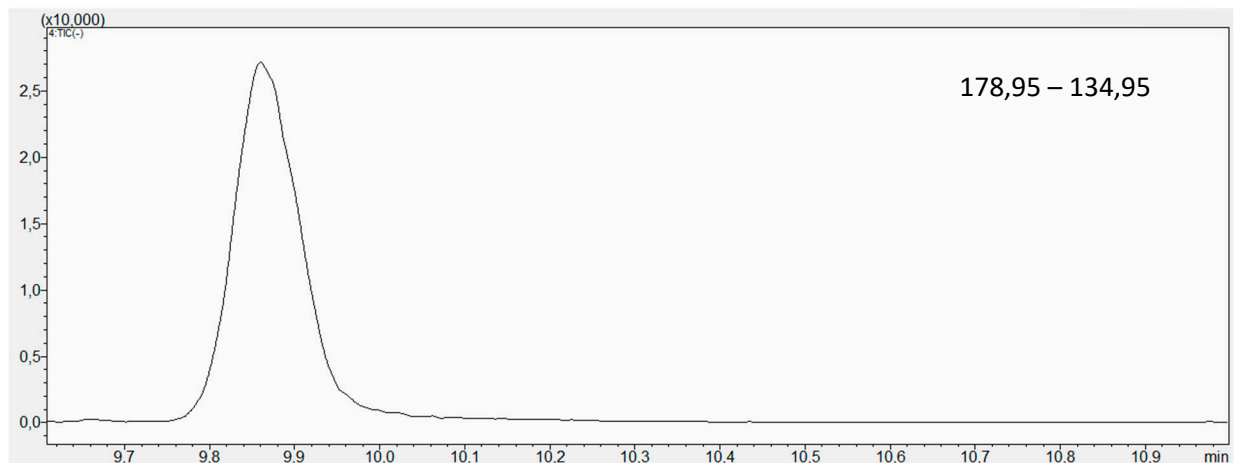

**Figure S5.** Striatum multiple reaction monitoring (MRM) chromatogram. Negative ion mode (ESI-). Caffeic acid (internal standart).

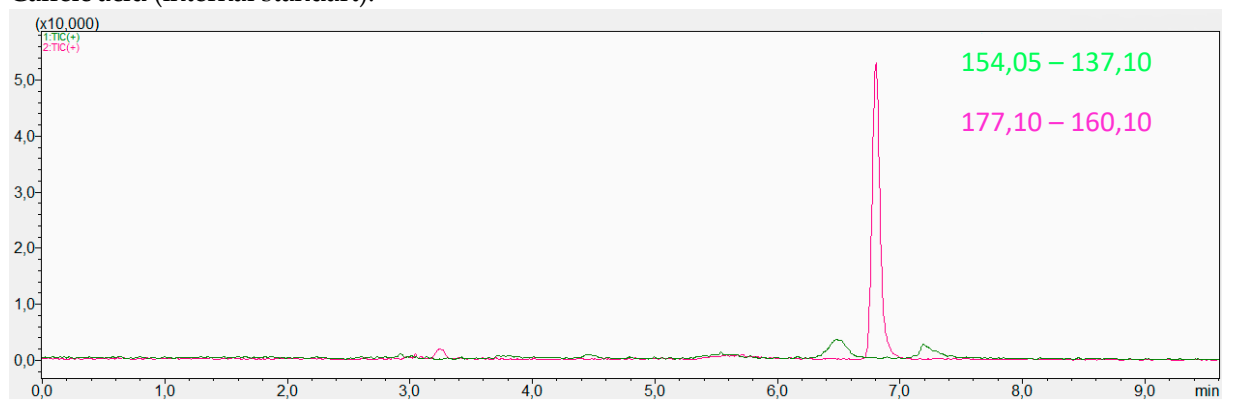

**Figure S6.** Hippocampus multiple reaction monitoring (MRM) chromatogram. Positive ion mode (ESI+). Dopamine green, serotonin – pink

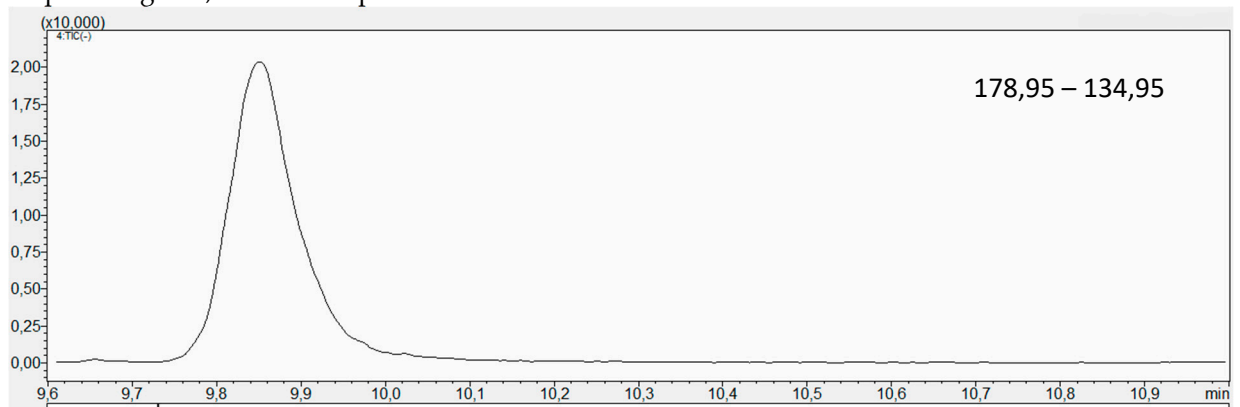

**Figure S7.** Hippocampus multiple reaction monitoring (MRM) chromatogram. Negative ion mode (ESI-). Caffeic acid (internal standart).
